# Supplementary material for: Evolving affinity between Coulombic reversibility and hysteretic phase transformations in nano-structured silicon-based lithium-ion batteries
Source: PubMed Central journal article supplement (PMC5797158; doi:10.1038/s41467-018-02824-w), 2018-02-02
Supplement: 41467_2018_2824_MOESM3_ESM.pdf [file 41467_2018_2824_MOESM3_ESM.pdf]

## **Description of Additional Supplementary Files**

File Name: Supplementary Movie 1

Description: Movie clips of tilting STEM-HAADF image series for delithiated amorphous-Si in type-A electrode after the 2<sup>nd</sup> cycle.

File Name: Supplementary Movie 2

Description: Movie clips of close-up tilting STEM-HAADF image series for delithiated amorphous-Si in type-A electrode after the 2<sup>nd</sup> cycle.
